# Supplementary material for: CBD Inhibits In Vivo Development of Human Breast Cancer Tumors
Source: MDPI journal article supplement (doi:10.3390/ijms241713235), 2023-08-26
Supplement: s1 [file s1]

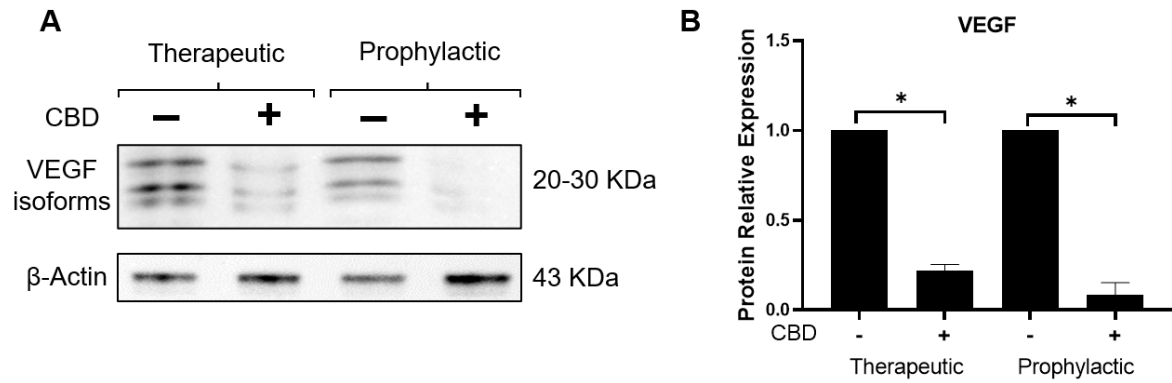

**Supplementary figure S1. CBD decreased the expression of VEGF protein in 6D cell tumors. (A)** Representative western blot showing the isoforms 121, 165 and 189 of the protein VEGF (Vascular Endothelial Growth Factor) detected by the anti-VEGF (A-20) antibody (Santa Cruz Biotechnology INC., CA, USA). Sixty-day tumors from mice that were treated with CBD or CBD-untreated under TS and PS conditions. **(B)** Densitometric analysis of the expression levels of VEGF. The values were normalized to actin and expressed relative to those in CBD-untreated tumors. Data represent the average of three different tumors. Asterisks indicate  $p < 0.05$ .
